# Supplementary material for: Amino acid assisted synthesis of mesoporous TiO2 nanocrystals for high performance dye-sensitized solar cells
Source: Royal Society of Chemistry journal article supplement (doi:10.1039/c2jm16762j), 2012-01-01
Supplement: c2jm16762j.pdf [file c2jm16762j.pdf]

## Supporting Information

### Amino acid assisted synthesis of mesoporous TiO<sub>2</sub> nanocrystals for high performance dye-sensitized solar cells

Xia Wu,<sup>a</sup> Jian Liu,<sup>a</sup> Zhigang Chen,<sup>a</sup> Qihua Yang,<sup>\*b</sup> Can Li,<sup>b</sup> Gaoqing Lu,<sup>a</sup> Lianzhou Wang<sup>\*a</sup>

#### Experimental Section:

**Synthesis:** 36.5 mg of L-lysine was dissolved in the solution containing 35g of deionized water and 1.83 g of octane with stirring at 60°C. 4.25 g of titanium iso-butoxide Ti(O<sup>i</sup>Bu)<sub>4</sub> was added to the mixture with stirring at 60°C. The final molar composition in the solution was 1 Ti(O<sup>i</sup>Bu)<sub>4</sub>: 0.02 L-lysine: 1.28 octane: 155.5 H<sub>2</sub>O. The resulting mixture was stirred for 20 h at 60°C followed by being kept statically at 100°C for 24 h. Thus obtained sample was calcined in furnace at 350°C to remove any organic residuals.

**Fabrication of DSSCs:** Both mesoporous TiO<sub>2</sub> nanocrystals (TiO<sub>2</sub>-MS) films and Degussa P25 films were prepared by doctor blading and subsequently annealed at 450°C for 30 min to remove any organic species and improve the inter-connection between the particles and the contact between the TiO<sub>2</sub> film and FTO substrate. The average thickness of the films was *ca.* 10 μm. Then the resulting film was soaked in N719 dye solution (0.5mM, 1:1 (v/v) mixture of acetonitrile (HPLC, Lab-scan) and tert-butanol (LR, Ajax Chemicals), Dyesol) for 24h. Subsequently, the dye-covered TiO<sub>2</sub> electrode were assembled with Pt-counter electrode (Dyesol) into a sandwich type cell and sealed with a spacer of 30 μm thickness (Surlyn, DuPont) with a drop of the I<sup>-</sup>/I<sub>3</sub><sup>-</sup> organic solvent based electrolyte (EL-HPE, Dyesol) introduced via vacuum back-filling.

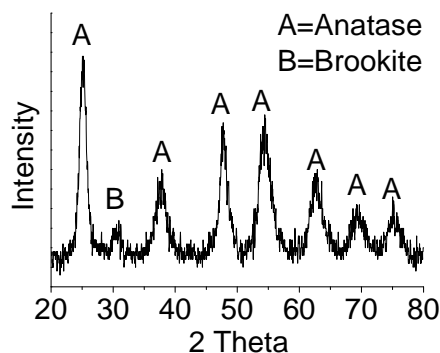

S-Fig.1 Wide-angle XRD pattern of TiO<sub>2</sub>-MS.

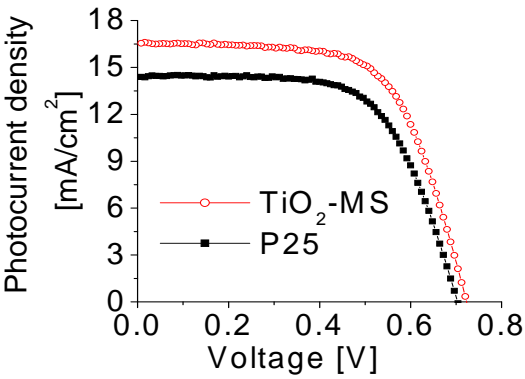

S-Fig.2 Photovoltage–current characteristics of DSSCs prepared by using TiO<sub>2</sub>-MS and P25 photoanodes under a solar simulator (AM 1.5, 100 mW cm<sup>-2</sup>).
